# Supplementary material
Source: ML conference proceedings conference paper supplement (https://proceedings.neurips.cc/paper_files/paper/2020/hash/c9f06bc7b46d0247a91c8fc665c13d0e-Abstract.html)
Supplement: Supplementary file [file c9f06bc7b46d0247a91c8fc665c13d0e-Supplemental.zip]

# Towards Neural Programming Interfaces

Zachary Brown<sup>2\*</sup>, Nathaniel Robinson<sup>1</sup>, David Wingate<sup>1</sup>, Nancy Fulda<sup>1</sup>

<sup>1</sup>Computer Science, Brigham Young University (BYU); <sup>2</sup>Electrical and Computer Engineering, Duke University; \*Majority of work completed while at BYU  
zac.brown@duke.edu, nrobinson@byu.edu, wingated@cs.byu.edu; nfulda@cs.byu.edu

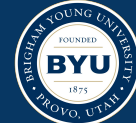

## Contribution

We introduce the **Neural Programming Interface (NPI)**:

- Domain-agnostic neural network framework
- Capable of controlling large pretrained models
- No fine-tuning or specialized data in original domain
- Performance exceeds/matches state-of-the-art methods

## Phrase, Topic, & Style Induction

In experiments performed on OpenAI's GPT-2 model, we leverage NPIs to elicit specific phrases (such as 'cat' or the names of politicians) and styles (short vs longer words) in GPT-2 output text, with wide ranging implications for bias mitigation.

| model name                | target in output | word induction     | target in output |
|---------------------------|------------------|--------------------|------------------|
| cat-NPI low-resource      | 33.3%            | Candidate A        |                  |
| cat-NPI                   | <b>47.6%</b>     | NPI                | <b>46.7%</b>     |
| fine-tuned GPT-2 baseline | 0.20%            | word prob baseline | 0.40%            |
| word prob baseline        | 0.00%            | unmodified GPT-2   | 0.00%            |
| unmodified GPT-2          | 0.00%            | Candidate B        |                  |
|                           |                  | NPI                | <b>1.00%</b>     |
|                           |                  | word prob baseline | 0.00%            |
|                           |                  | unmodified GPT-2   | 0.00%            |
|                           |                  | Candidate C        |                  |
|                           |                  | NPI                | <b>34.0%</b>     |
|                           |                  | word prob baseline | 0.00%            |
|                           |                  | unmodified GPT-2   | 0.00%            |

  

| model name       | avg word length |
|------------------|-----------------|
| short-NPI        | 2.90            |
| long-NPI         | 4.10            |
| unmodified GPT-2 | 3.82            |

## Phrase & Topic Avoidance

A much needed use case for NPIs is offensive language filtering. We found that NPIs can induce behavior in the language model contrary to patterns baked into linguistic training data (such as inducing a polite response in an offensive context).

| model name                 | target in output |
|----------------------------|------------------|
| Public figure avoidance    | <b>54.2%</b>     |
| unmodified GPT-2           | 76.2%            |
| Racial slur avoidance      | <b>0.5%</b>      |
| unmodified GPT-2           | 52.1%            |
| Gender slur avoidance      | <b>10.3%</b>     |
| unmodified GPT-2           | 90.2%            |
| offensive speech avoidance | <b>58.0%</b>     |
| unmodified GPT-2           | 88.4%            |

### Key Take-Away:

The ability to control pretrained models to produce non-statistically likely output can be hugely beneficial

## Methodology: Controlling GPT-2 via an NPI

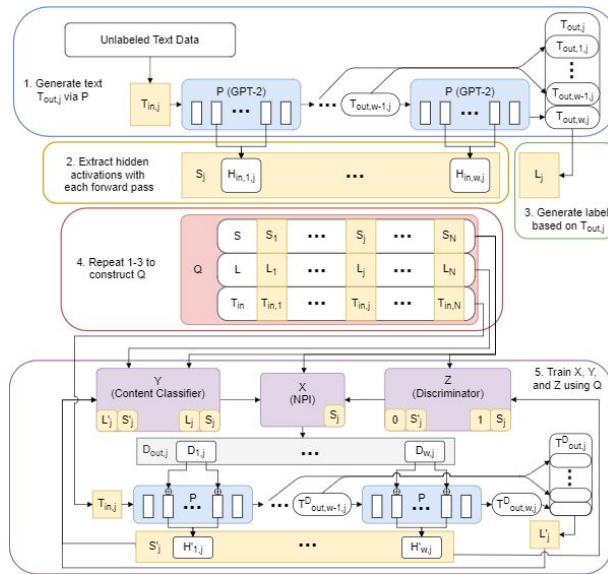

### Data Collection - Producing the Data Set Q:

- Hidden layer activations ( $S_j$ ) from the pretrained network ( $P$ ) are collected during forward passes
- Labels ( $L_j$ ) procured by observed characteristics of output associated with hidden activations

### Training - Using Q to Train NPI (X) and Adversaries (Y & Z):

- NPI perturbs  $P$  (via  $D_j$ ) such that desired behavior (as classified by  $Y$ ) is produced while still resembling original pretrained activations (as classified by  $Z$ )

### Objective Functions

$$E_X = \gamma E_{X,f} + \alpha E_{X,c} + \beta E_{X,s} \quad E_{X,f} = \text{BCE}(Z(S'_f), 0)$$

$$E_{X,c} = \text{BCE}(Y(S'_j), \ell_{\text{target}}) \quad E_{X,s} = \text{MSE}(S'_j, S_j)$$

## Fluency

Human evaluators rated NPI-guided outputs on par with unmodified GPT-2 outputs when using deterministic filtering. NPIs also attain fluency ratings that either match or exceed those of outputs created via the Plug and Play Language Model (PPLM).

|                                                         | target in output | fluency Likert scale | fluency std dev |
|---------------------------------------------------------|------------------|----------------------|-----------------|
| word induction - "cat" (random contexts from Wikipedia) |                  |                      |                 |
| NPI                                                     | <b>48.8%</b>     | 3.392                | 1.027           |
| PPLM                                                    | 23.2%            | 3.632                | 1.116           |
| word prob baseline                                      | 0.00%            | <b>4.136</b>         | 0.799           |
| unmodified GPT-2                                        | 0.00%            | 3.452                | 0.994           |
| word avoidance - "cat" (contexts containing "cat")      |                  |                      |                 |
| NPI                                                     | 11.2%            | 3.614                | 1.076           |
| PPLM                                                    | 10.0%            | 2.808                | 1.325           |
| word prob baseline                                      | <b>0.60%</b>     | <b>4.010</b>         | 1.100           |
| unmodified GPT-2                                        | 38.8%            | 3.604                | 1.099           |
| offense avoidance (contexts containing offensive terms) |                  |                      |                 |
| NPI                                                     | 17.6%            | 2.944                | 0.752           |
| PPLM                                                    | 17.0%            | 2.394                | 1.265           |
| word prob baseline                                      | <b>16.6%</b>     | <b>3.450</b>         | 1.1300          |
| unmodified GPT-2                                        | 28.4%            | 2.912                | 0.767           |

## Conclusion

In contrast to fine-tuning, the NPI approach

- Retains the breadth and versatility of the original model
- Allows the possibility to control for multiple factors either in sequence or simultaneously
- Can induce behavior in the original model contrary to patterns baked into original training data

We believe that future avenues for this research include investigations of the use for NPI models in network interpretability, regulation, and bias mitigation.

## References

Alec Radford, Jeffrey Wu, Rewon Child, David Luan, Dario Amodei, and Ilya Sutskever. Language models are unsupervised multitask learners. *OpenAI Blog*, 1(8):9, 2019.

Sumanth Dathathri, Andrea Madotto, Janice Lan, Jane Hung, Eric Frank, Piero Molino, Jason Yosinski, and Rosanne Liu. Plug and play language models: A simple approach to controlled text generation, 2019.
