# Supplementary material
Source: ML conference proceedings conference paper supplement (https://proceedings.neurips.cc/paper_files/paper/2020/hash/c9f06bc7b46d0247a91c8fc665c13d0e-Abstract.html)
Supplement: Supplementary file [file c9f06bc7b46d0247a91c8fc665c13d0e-Supplemental.zip]

# Towards Neural Programming Interfaces

Zachary Brown<sup>2\*</sup>, Nathaniel Robinson<sup>1</sup>, David Wingate<sup>1</sup>, Nancy Fulda<sup>1</sup>

<sup>1</sup>Computer Science, Brigham Young University

<sup>2</sup>Electrical and Computer Engineering, Duke University

\*Majority of work completed while at Brigham Young University

# Motivation

## Pretrained Neural Network

- Strong domain model
- Many parameters
- Difficult and expensive to (fine)tune

## Neural Programming Interface (NPI)

- Control
- No change to pretrained model

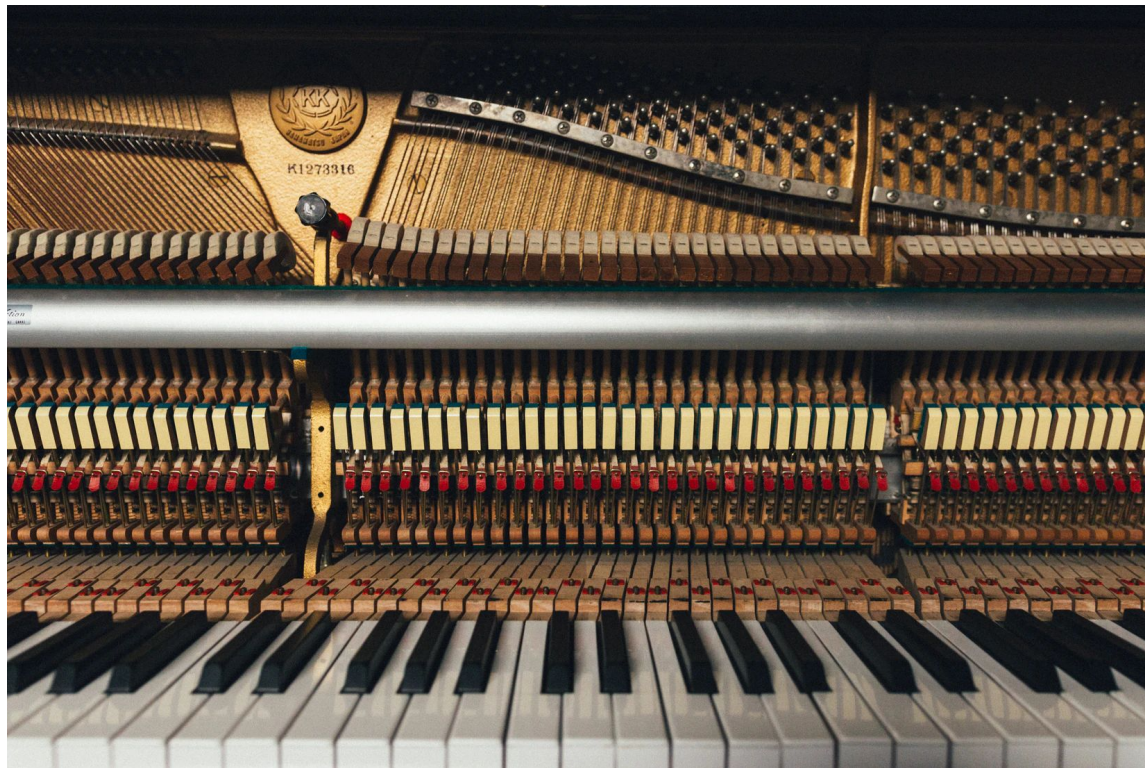

Markus Gjengaar, <https://unsplash.com/photos/v3l8kTbPhzA>

# Motivation

## Avoiding Undesirable Output

- Offensive speech
  - Racial slurs
  - Gender slurs
  - Other
- Politically charged phrases and topics

## Encouraging Desirable Output

- Preferred phrases and topics
  - E.g. 'cat' for a pet owner
  - Favored political candidates
  - Other
- Style preferences
  - E.g. simple vs diverse vocabulary

# Approach: NPIs - Learn a New Model to Control P

Use a neural network (a Neural Programming Interface or NPI) to control a large pretrained network  $P$  by perturbing hidden layer activations

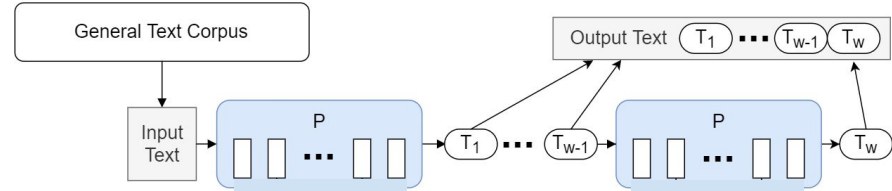

# Approach: NPIs - Learn a New Model to Control P

Use a neural network (a Neural Programming Interface or NPI) to control a large pretrained network  $P$  by perturbing hidden layer activations

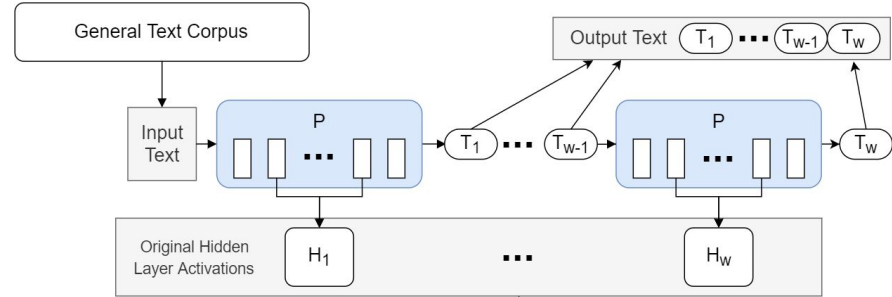

# Approach: NPIs - Learn a New Model to Control P

Use a neural network (a Neural Programming Interface or NPI) to control a large pretrained network P by perturbing hidden layer activations

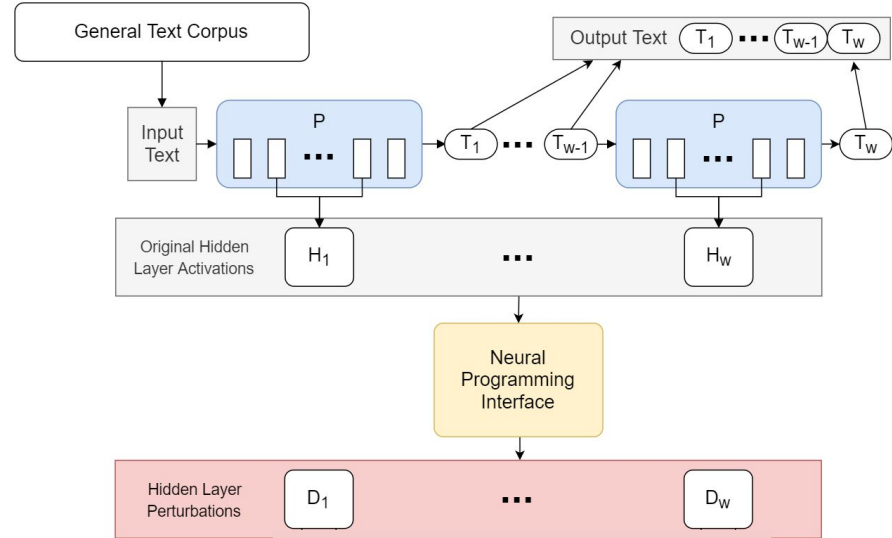

# Approach: NPIs - Learn a New Model to Control P

Use a neural network (a Neural Programming Interface or NPI) to control a large pretrained network  $P$  by perturbing hidden layer activations

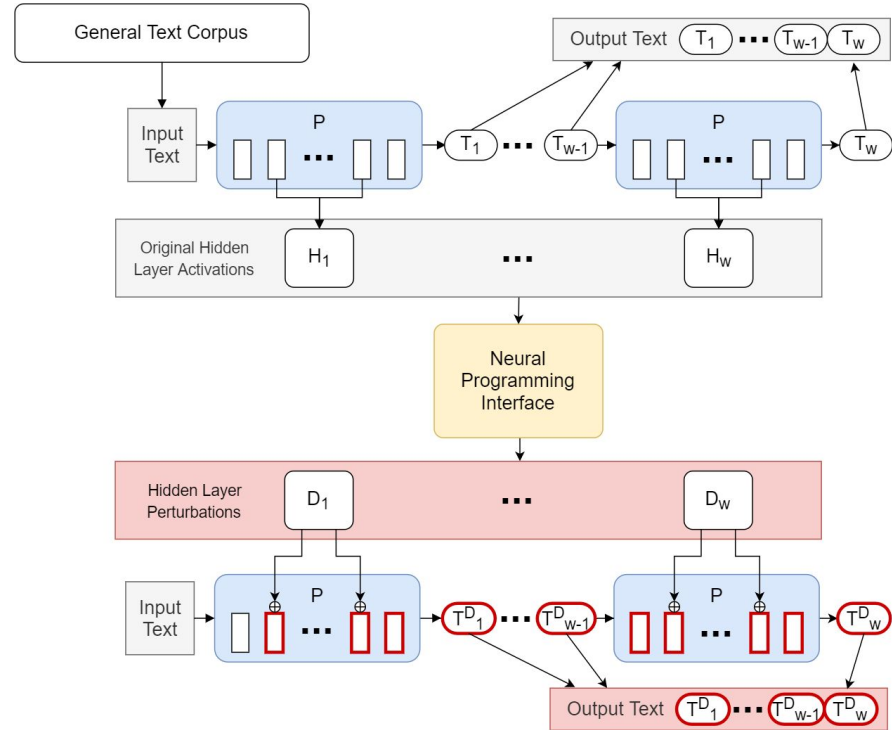

# Approach: NPIs - Learn a New Model to Control P

Use a neural network (a Neural Programming Interface or NPI) to control a large pretrained network P by perturbing hidden layer activations

- Domain agnostic
  - Retains P's domain model
- NPI can learn various 'control functions' which are hard to capture in the original domain





# Results

## Avoiding Undesirable Output

| model name                                     | target in output |
|------------------------------------------------|------------------|
| Public figure avoidance<br>unmodified GPT-2    | 54.2%<br>76.2%   |
| Racial slur avoidance<br>unmodified GPT-2      | 0.5%<br>52.1%    |
| Gender slur avoidance<br>unmodified GPT-2      | 10.3%<br>90.2%   |
| offensive speech avoidance<br>unmodified GPT-2 | 58.0%<br>88.4%   |

## Encouraging Desirable Output

| model name                                                     | target in output |
|----------------------------------------------------------------|------------------|
| <i>word induction - "cat" (random contexts from Wikipedia)</i> |                  |
| NPI                                                            | 48.8%            |
| PPLM                                                           | 23.2%            |
| unmodified GPT-2                                               | 0%               |

| model name       | avg word length | num long words |
|------------------|-----------------|----------------|
| short-NPI        | 2.90            | 3.440          |
| long-NPI         | 4.10            | 14.013         |
| unmodified GPT-2 | 3.82            | 9.425          |

# References

- [1] Alec Radford, Jeffrey Wu, Rewon Child, David Luan, Dario Amodei, and Ilya Sutskever. Language models are unsupervised multitask learners. *OpenAI Blog*, 1(8):9, 2019.
- [2] Sumanth Dathathri, Andrea Madotto, Janice Lan, Jane Hung, Eric Frank, Piero Molino, Jason Yosinski, and Rosanne Liu. Plug and play language models: A simple approach to controlled text generation, 2019.

# Thank You

Paper: “Towards Neural Programming Interfaces”, ID: 3575

Lab Website: [dragn.ai](https://dragn.ai)

Code: <https://github.com/DRAGNLabs/towards-neural-programming-interfaces>

Contact: [zac.brown@duke.edu](mailto:zac.brown@duke.edu), [nrobinson@byu.edu](mailto:nrobinson@byu.edu)

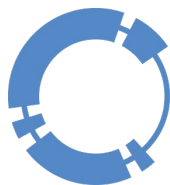

PCC Lab

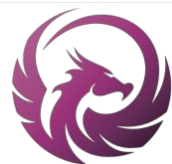

DRAGN Labs
